# Supplementary material for: In situTEM study of lithiation into a PPy coated α-MnO2/graphene foam freestanding electrode
Source: Royal Society of Chemistry journal article supplement (doi:10.1039/c8qm00153g), 2018-01-01
Supplement: c8qm00153g3.pdf [file c8qm00153g3.pdf]

## Electronic Supplementary Information

### ***In-situ* TEM study of lithiation into PPy coated $\alpha$ -MnO<sub>2</sub>/graphene foam freestanding electrode**

Mohammad Akbari Garakani, Sara Abouali, Jiang Cui, Jang-Kyo Kim\*

Department of Mechanical and Aerospace Engineering, The Hong Kong University of Science and Technology, Clear Water Bay, Kowloon, Hong Kong

\*Email: [mejkkim@ust.hk](mailto:mejkkim@ust.hk)

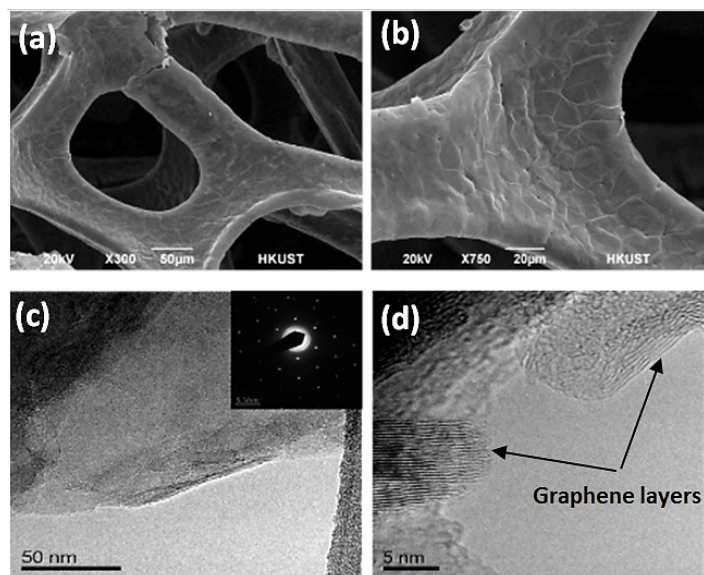

**Figure S1.** (a, b) SEM images of cellular-structured freestanding GF network, (c, d) TEM analysis of GF with a SAED pattern of crystallographic planes in inset.

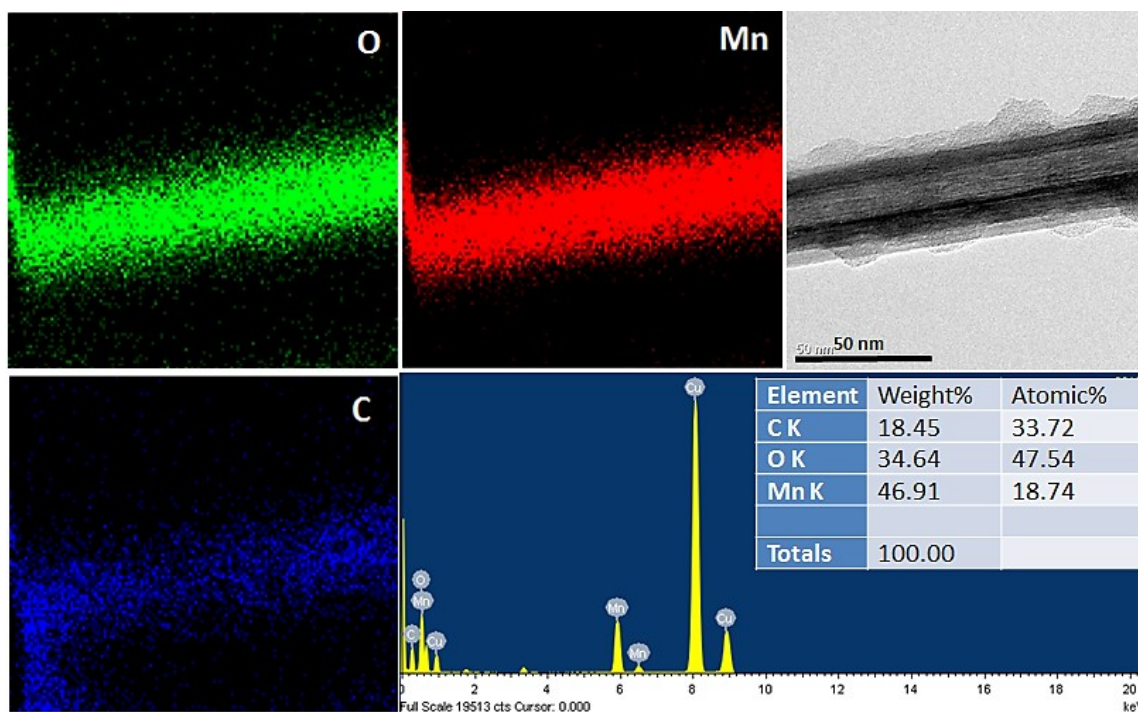

**Figure S2.** Elemental maps and EDS results of a MnO<sub>2</sub>-PPy nanowire.

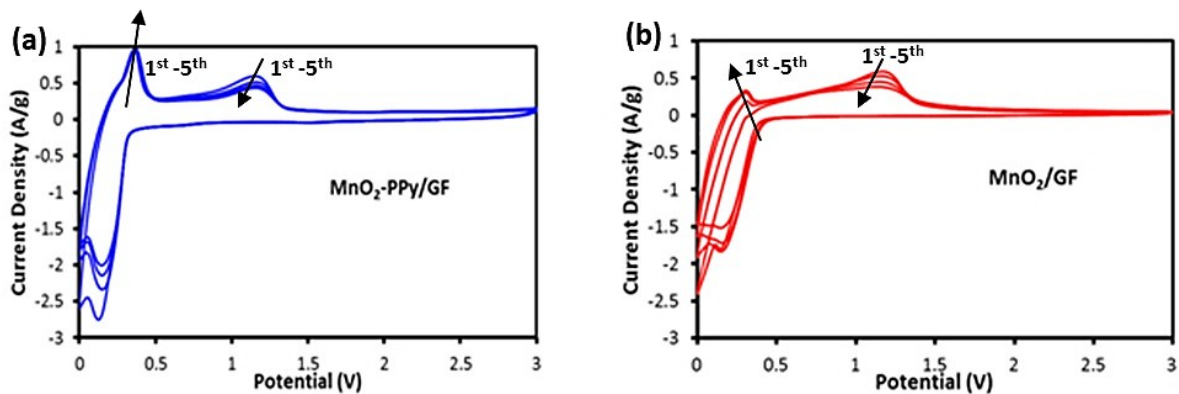

**Figure S3.** CV curves of (a)  $\text{MnO}_2\text{-PPy/GF}$  and (b)  $\text{MnO}_2\text{/GF}$  electrodes at a scan rate of  $0.2 \text{ mV s}^{-1}$ .

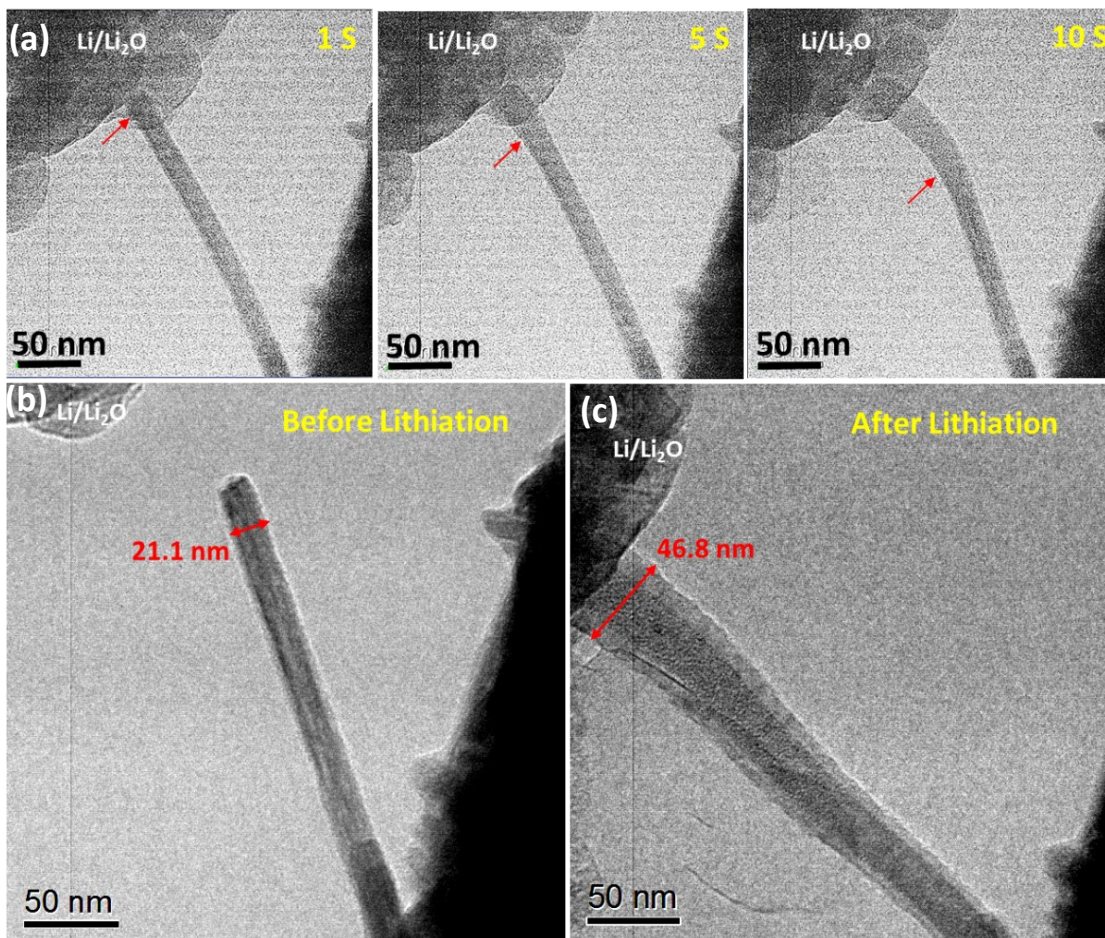

**Figure S4.** (a) Sequential *in situ* TEM images of the initial lithiation process of  $\text{MnO}_2$  nanowire. TEM images of  $\text{MnO}_2$  (b) before and (c) after complete lithiation.
